# Supplementary material for: The Effect of Berberine on Metabolic Profiles in Type 2 Diabetic Patients: A Systematic Review and Meta‐Analysis of Randomized Controlled Trials
Source: Hindawi journal article supplement (doi:10.1155/2021/2074610), 2021-01-01
Supplement: f1 [file 2074610.f1.pdf]

Queries in  
pubmed  
Search

- Query
- #45 Search (((((((((((((((((((((Medicine, Chinese Traditional[MeSH Terms]) OR Drugs, Chinese Herbal[MeSH Terms]) OR Medicine, Oriental Traditional[MeSH Terms]) OR Plants, Medicinal[MeSH Terms]) OR ((Medicinal Plant[Text Word] OR Plant, Medicinal[Text Word] OR Medicinal Plants[Text Word] OR Pharmaceutical Plants[Text Word] OR Pharmaceutical Plant[Text Word] OR Plant, Pharmaceutical[Text Word] OR Plants, Pharmaceutical[Text Word] OR Healing Plants,[Text Word] OR Healing Plant[Text Word] OR Plant, Healing[Text Word] OR Plants, Healing[Text Word] OR Medicinal Herbs[Text Word] OR Herb, Medicinal[Text Word] OR Medicinal Herb[Text Word] OR Herbs, Medicinal[Text Word]))) OR ((Oriental Medicine, Traditional[Text Word] OR Medicine, Traditional Oriental[Text Word] OR Traditional Oriental Medicine[Text Word] OR Traditional Oriental Medicines[Text Word] OR Traditional Medicine, Oriental[Text Word] OR Traditional East Asian Medicine[Text Word] OR Medicine, Traditional, East Asia[Text Word] OR Traditional Medicine, East Asia[Text Word] OR Traditional Far Eastern Medicine[Text Word] OR East Asian Traditional Medicine[Text Word] OR Oriental Traditional Medicine[Text Word] OR Medicine, Oriental Traditional[Text Word] OR East Asian Medicine[Text Word] OR East Asian Medicines[Text Word] OR Medicine, East Asian[Text Word] OR Oriental Medicine[Text Word] OR Medicine, Far East[Text Word] OR East Medicine, Far[Text Word] OR East Medicines, Far[Text Word] OR Far East Medicine[Text Word] OR Far East Medicines[Text Word] OR Medicines, Far East[Text Word] OR Medicine, East Asia[Text Word] OR Asia Medicines, East[Text Word] OR East Asia Medicine[Text Word] OR East Asia Medicines[Text Word] OR Medicines, East Asia[Text Word] OR Medicine, Oriental[Text Word]))) OR ((Chinese Drugs, Plant[Text Word] OR Chinese Herbal Drugs[Text Word] OR Herbal Drugs, Chinese[Text Word] OR Plant Extracts, Chinese[Text Word] OR Chinese Plant Extracts[Text Word] OR Extracts, Chinese Plant[Text Word]))) OR ((Traditional Chinese Medicine[Text Search (((((((Controlled Clinical Trial[Publication Type]) OR randomized controlled trial[Publication Type]) OR randomized controlled trials[MeSH Terms]) OR random allocation[MeSH Terms]) OR double-blind method[MeSH Terms]) OR single-blind method[MeSH Terms]) OR clinical study[Title/Abstract]) OR (((clinical trial[Title/Abstract] OR Controlled Clinical Search ((clinical trial[Title/Abstract] OR Controlled Clinical Trial[Title/Abstract] OR randomized controlled trial[Title/Abstract] OR Search clinical study[Title/Abstract]
- #44 Search single-blind method[MeSH Terms]
- #43 Search double-blind method[MeSH Terms]
- #41 Search random allocation[MeSH Terms]
- #38 Search randomized controlled trials[MeSH Terms]
- #37 Search randomized controlled trial[Publication Type]
- #36 Search Controlled Clinical Trial[Publication Type]

#27

Search (((((((((((((((Medicine, Chinese Traditional[MeSH Terms]) OR Drugs, Chinese Herbal[MeSH Terms]) OR Medicine, Oriental Traditional[MeSH Terms]) OR Plants, Medicinal[MeSH Terms]) OR ((Medicinal Plant[Text Word] OR Plant, Medicinal[Text Word] OR Medicinal Plants[Text Word] OR Pharmaceutical Plants[Text Word] OR Pharmaceutical Plant[Text Word] OR Plant, Pharmaceutical[Text Word] OR Plants, Pharmaceutical[Text Word] OR Healing Plants,[Text Word] OR Healing Plant[Text Word] OR Plant, Healing[Text Word] OR Plants, Healing[Text Word] OR Medicinal Herbs[Text Word] OR Herb, Medicinal[Text Word] OR Medicinal Herb[Text Word] OR Herbs, Medicinal[Text Word]))) OR ((Oriental Medicine, Traditional[Text Word] OR Medicine, Traditional Oriental[Text Word] OR Traditional Oriental Medicine[Text Word] OR Traditional Oriental Medicines[Text Word] OR Traditional Medicine, Oriental[Text Word] OR Traditional East Asian Medicine[Text Word] OR Medicine, Traditional, East Asia[Text Word] OR Traditional Medicine, East Asia[Text Word] OR Traditional Far Eastern Medicine[Text Word] OR East Asian Traditional Medicine[Text Word] OR Oriental Traditional Medicine[Text Word] OR Medicine, Oriental Traditional[Text Word] OR East Asian Medicine[Text Word] OR East Asian Medicines[Text Word] OR Medicine, East Asian[Text Word] OR Oriental Medicine[Text Word] OR Medicine, Far East[Text Word] OR East Medicine, Far[Text Word] OR East Medicines, Far[Text Word] OR Far East Medicine[Text Word] OR Far East Medicines[Text Word] OR Medicines, Far East[Text Word] OR Medicine, East Asia[Text Word] OR Asia Medicines, East[Text Word] OR East Asia Medicine[Text Word] OR East Asia Medicines[Text Word] OR Medicines, East Asia[Text Word] OR Medicine, Oriental[Text Word]))) OR ((Chinese Drugs, Plant[Text Word] OR Chinese Herbal Drugs[Text Word] OR Herbal Drugs, Chinese[Text Word] OR Plant Extracts, Chinese[Text Word] OR Chinese Plant Extracts[Text Word] OR Extracts, Chinese Plant[Text Word]))) OR ((Traditional Chinese Medicine[Text

Search ((((((diabetes mellitus, non-insulin-dependent[MeSH Terms]) OR insulin  
 resistance[MeSH Terms]) OR Metabolic Syndrome[MeSH Terms]) OR  
 ((Diabetes Mellitus, Noninsulin-Dependent[Text Word] OR Diabetes Mellitus,  
 Ketosis-Resistant[Text Word] OR Diabetes Mellitus, Ketosis Resistant[Text  
 Word] OR Ketosis-Resistant Diabetes Mellitus[Text Word] OR Diabetes  
 Mellitus, Non Insulin Dependent[Text Word] OR Diabetes Mellitus, Non-  
 Insulin-Dependent[Text Word] OR Non-Insulin-Dependent Diabetes  
 Mellitus[Text Word] OR Diabetes Mellitus, Stable[Text Word] OR Stable  
 Diabetes Mellitus[Text Word] OR Diabetes Mellitus, Type II[Text Word] OR  
 NIDDM[Text Word] OR Diabetes Mellitus, Noninsulin Dependent[Text Word]  
 OR Diabetes Mellitus, Maturity-Onset[Text Word] OR Diabetes Mellitus,  
 Maturity Onset[Text Word] OR Maturity-Onset Diabetes Mellitus[Text Word]  
 OR Maturity Onset Diabetes Mellitus[Text Word] OR MODY[Text Word] OR  
 #26 Diabetes Mellitus, Slow-Onset[Text Word] OR Diabetes Mellitus, Slow  
 Onset[Text Word] OR Slow-Onset Diabetes Mellitus[Text Word] OR Type 2  
 Diabetes Mellitus[Text Word] OR Noninsulin-Dependent Diabetes  
 Mellitus[Text Word] OR Noninsulin Dependent Diabetes Mellitus[Text Word]  
 OR Maturity-Onset Diabetes[Text Word] OR Diabetes, Maturity-Onset[Text  
 Word] OR Maturity Onset Diabetes[Text Word] OR Type 2 Diabetes[Text  
 Word] OR Diabetes, Type 2[Text Word] OR Diabetes Mellitus, Adult-  
 Onset[Text Word] OR Adult-Onset Diabetes Mellitus[Text Word] OR Diabetes  
 Mellitus, Adult Onset[Text Word]))) OR (Search (insulin resistance[Text Word]  
 OR Resistance, Insulin[Text Word] OR Insulin Sensitivity[Text Word] OR  
 Sensitivity, Insulin[Text Word])) OR (((insulin resistance[Text Word] OR  
 Resistance, Insulin[Text Word] OR Insulin Sensitivity[Text Word] OR  
 Sensitivity, Insulin[Text Word]))) OR ((Metabolic Syndrome[Text Word] OR  
 Metabolic Svndromes[Text Word] OR Svndrome. Metabolic[Text Word] OR  
 Search (Metabolic Syndrome[Text Word] OR Metabolic Syndromes[Text  
 Word] OR Syndrome, Metabolic[Text Word] OR Syndromes, Metabolic[Text  
 Word] OR Metabolic Syndrome X[Text Word] OR Insulin Resistance  
 #25 Syndrome X[Text Word] OR Syndrome X, Metabolic[Text Word] OR  
 Syndrome X, Insulin Resistance[Text Word] OR Metabolic X Syndrome[Text  
 Word] OR Syndrome, Metabolic X[Text Word] OR X Syndrome,  
 Metabolic[Text Word] OR Dysmetabolic Syndrome X[Text Word] OR  
 Syndrome X, Dysmetabolic[Text Word] OR Reaven Syndrome X[Text Word]  
 #24 Search ((insulin resistance[Text Word] OR Resistance, Insulin[Text Word] OR  
 Insulin Sensitivity[Text Word] OR Sensitivity, Insulin[Text Word]))  
 #23 Search Search (insulin resistance[Text Word] OR Resistance, Insulin[Text  
 Word] OR Insulin Sensitivity[Text Word] OR Sensitivity, Insulin[Text Word])

- #22 Search (Diabetes Mellitus, Noninsulin-Dependent[Text Word] OR Diabetes Mellitus, Ketosis-Resistant[Text Word] OR Diabetes Mellitus, Ketosis Resistant[Text Word] OR Ketosis-Resistant Diabetes Mellitus[Text Word] OR Diabetes Mellitus, Non Insulin Dependent[Text Word] OR Diabetes Mellitus, Non-Insulin-Dependent[Text Word] OR Non-Insulin-Dependent Diabetes Mellitus[Text Word] OR Diabetes Mellitus, Stable[Text Word] OR Stable Diabetes Mellitus[Text Word] OR Diabetes Mellitus, Type II[Text Word] OR NIDDM[Text Word] OR Diabetes Mellitus, Noninsulin Dependent[Text Word] OR Diabetes Mellitus, Maturity-Onset[Text Word] OR Diabetes Mellitus, Maturity Onset[Text Word] OR Maturity-Onset Diabetes Mellitus[Text Word] OR Maturity Onset Diabetes Mellitus[Text Word] OR MODY[Text Word] OR Diabetes Mellitus, Slow-Onset[Text Word] OR Diabetes Mellitus, Slow Onset[Text Word] OR Slow-Onset Diabetes Mellitus[Text Word] OR Type 2 Diabetes Mellitus[Text Word] OR Noninsulin-Dependent Diabetes
- #21 Search Metabolic Syndrome[MeSH Terms]
- #20 Search insulin resistance[MeSH Terms]
- #19 Search diabetes mellitus, non-insulin-dependent[MeSH Terms]  
 Search ((((((((((((((Medicine, Chinese Traditional[MeSH Terms])) OR Drugs, Chinese Herbal[MeSH Terms])) OR Medicine, Oriental Traditional[MeSH Terms])) OR Plants, Medicinal[MeSH Terms])) OR ((Medicinal Plant[Text Word] OR Plant, Medicinal[Text Word] OR Medicinal Plants[Text Word] OR Pharmaceutical Plants[Text Word] OR Pharmaceutical Plant[Text Word] OR Plant, Pharmaceutical[Text Word] OR Plants, Pharmaceutical[Text Word] OR Healing Plants,[Text Word] OR Healing Plant[Text Word] OR Plant, Healing[Text Word] OR Plants, Healing[Text Word] OR Medicinal Herbs[Text Word] OR Herb, Medicinal[Text Word] OR Medicinal Herb[Text Word] OR Herbs, Medicinal[Text Word]))) OR ((Oriental Medicine, Traditional[Text Word] OR Medicine, Traditional Oriental[Text Word] OR Traditional Oriental Medicine[Text Word] OR Traditional Oriental Medicines[Text Word] OR Traditional Medicine, Oriental[Text Word] OR Traditional East Asian Medicine[Text Word] OR Medicine, Traditional, East Asia[Text Word] OR Traditional Medicine, East Asia[Text Word] OR Traditional Far Eastern Medicine[Text Word] OR East Asian Traditional Medicine[Text Word] OR Oriental Traditional Medicine[Text Word] OR Medicine, Oriental Traditional[Text Word] OR East Asian Medicine[Text Word] OR East Asian Medicines[Text Word] OR Medicine, East Asian[Text Word] OR Oriental Medicine[Text Word] OR Medicine, Far East[Text Word] OR East Medicine, Far[Text Word] OR East Medicines, Far[Text Word] OR Far East Medicine[Text Word] OR Far East Medicines[Text Word] OR Medicines, Far East[Text Word] OR Medicine, East Asia[Text Word] OR Asia Medicines, East[Text Word] OR East Asia Medicine[Text Word] OR East Asia Medicines[Text Word] OR Medicines, East Asia[Text Word] OR Medicine, Oriental[Text Word]))) OR ((Chinese Drugs, Plant[Text Word] OR Chinese Herbal Drugs[Text Word] OR Herbal Drugs, Chinese[Text Word] OR Plant Extracts, Chinese[Text Word] OR Chinese Plant Extracts[Text Word] OR Extracts, Chinese Plant[Text Word]))) OR ((Traditional Chinese Medicine[Text
- #18 Search (huang\*lian\*su[Text Word] OR xiao\*bo\* jian[Text Word])
- #17 Search Rhizoma coptidis[Text Word]
- #16 Search Coptis chinensis[Text Word]
- #15 Search Copti[Text Word] OR Goldthread[Text Word] OR Goldthreads[Text
- #14 Search huanglian[MeSH Terms]
- #13

- #12 Search Coptis[MeSH Terms]
- #11 Search berberine[MeSH Terms]
- #10 Search (Medicine, Chinese Traditional[Text Word] OR Drugs, Chinese Herbal[Text Word] OR Medicine, Oriental Traditional[Text Word] OR Plants, Search (Traditional Chinese Medicine[Text Word] OR Chung I Hsueh[Text Word] OR Hsueh, Chung I[Text Word] OR Traditional Medicine, Chinese[Text Word] OR Zhong Yi Xue[Text Word] OR Chinese Traditional Medicine[Text Word] OR Chinese Medicine, Traditional[Text Word] OR Traditional Tongue Diagnosis[Text Word] OR Tongue Diagnoses, Traditional[Text Word] OR Tongue Diagnosis, Traditional[Text Word] OR Traditional Tongue Diagnoses[Text Word] OR Traditional Tongue Assessment[Text Word] OR Search (Chinese Drugs, Plant[Text Word] OR Chinese Herbal Drugs[Text Word] OR Herbal Drugs, Chinese[Text Word] OR Plant Extracts, Chinese[Text Word] OR Chinese Plant Extracts[Text Word] OR Extracts, Chinese Plant[Text Word] Search (Oriental Medicine, Traditional[Text Word] OR Medicine, Traditional Oriental[Text Word] OR Traditional Oriental Medicine[Text Word] OR Traditional Oriental Medicines[Text Word] OR Traditional Medicine, Oriental[Text Word] OR Traditional East Asian Medicine[Text Word] OR Medicine, Traditional, East Asia[Text Word] OR Traditional Medicine, East Asia[Text Word] OR Traditional Far Eastern Medicine[Text Word] OR East Asian Traditional Medicine[Text Word] OR Oriental Traditional Medicine[Text Word] OR Medicine, Oriental Traditional[Text Word] OR East Asian Medicine[Text Word] OR East Asian Medicines[Text Word] OR Medicine, East Asian[Text Word] OR Oriental Medicine[Text Word] OR Medicine, Far East[Text Word] OR East Medicine, Far[Text Word] OR East Medicines, Far[Text Word] OR Far East Medicine[Text Word] OR Far East Search (Medicinal Plant[Text Word] OR Plant, Medicinal[Text Word] OR Medicinal Plants[Text Word] OR Pharmaceutical Plants[Text Word] OR Pharmaceutical Plant[Text Word] OR Plant, Pharmaceutical[Text Word] OR Plants, Pharmaceutical[Text Word] OR Healing Plants,[Text Word] OR Healing Plant[Text Word] OR Plant, Healing[Text Word] OR Plants, Healing[Text Word] Search Plants, Medicinal[MeSH Terms]
- #9
- #8
- #7
- #6
- #5
- #4 Search Medicine, Oriental Traditional[MeSH Terms]
- #3 Search Drugs, Chinese Herbal[MeSH Terms]
- #2 Search Medicine, Chinese Traditional[MeSH Terms]
